## EXCRETION AND DISTRIBUTION OF AMMONIA AND THE INFLUENCE OF BOUNDARY LAYER ACIDIFICATION IN EMBRYONIC RAINBOW TROUT (*ONCORHYNCHUS MYKISS*)

E. RAHAMAN-NORONHA<sup>1</sup>, M. J. O'DONNELL<sup>2</sup>, C. M. PILLEY<sup>1</sup> AND P. A. WRIGHT<sup>1,\*</sup>

<sup>1</sup>Department of Zoology, University of Guelph, Guelph, Ontario, Canada N1G 2W1 and <sup>2</sup>Department of Biology, McMaster University, Hamilton, Ontario, Canada L8S 4K1

Accepted 13 August 1996

### Summary

This study examined ammonia excretion by embryos of the rainbow trout (*Oncorhynchus mykiss*). The distribution of ammonia in relation to the H<sup>+</sup> distribution and electrical potential was determined. The influence of the pH of the unstirred layer (USL) of water next to the external surface of the embryo was also assessed. Eyed-up embryos (35–40 days post-fertilization) were exposed to various external water conditions [pH 6.0, pH 10.0, 1.6 mmol l<sup>-1</sup> NaCl, 0.0 mmol l<sup>-1</sup> NaCl, 0.2 mmol l<sup>-1</sup> NH<sub>4</sub>Cl, 2.5 mmol l<sup>-1</sup> borax buffer (Na<sub>2</sub>B<sub>4</sub>O<sub>7</sub>·10H<sub>2</sub>O), 2.5 mmol l<sup>-1</sup> Hepes, 0.1 mmol l<sup>-1</sup> amiloride] for 30 min and ammonia excretion rates, ammonia concentration in the perivitelline fluid (PVF) and yolk, and the pH of the PVF, yolk and USL were measured. The rate of ammonia excretion was dependent, in part, on the partial pressure gradient of NH<sub>3</sub> ( $\Delta P_{\text{NH}_3}$ ) from the PVF to the USL. Exposure to water of pH 6 increased, whereas NH<sub>4</sub>Cl or pH 10 exposure decreased, ammonia excretion rates. Elevated external Na<sup>+</sup> levels also influenced the rate

of ammonia excretion, but neither Na<sup>+</sup>-free water nor amiloride had any effect. The distribution of ammonia between the PVF and USL was dependent on the H<sup>+</sup> distribution, but ammonia was distributed according to the electrical potential between the PVF and yolk. The USL was 0.32 pH units more acidic than the bulk water. Addition of buffer to the external water eliminated the acid USL and decreased ammonia excretion rates. We conclude that rainbow trout embryos excrete ammonia primarily as NH<sub>3</sub>, but when external Na<sup>+</sup> levels are elevated, ammonia excretion may be independent of the  $P_{\text{NH}_3}$  gradient. The acidic USL next to the chorion probably facilitates NH<sub>3</sub> diffusion by maintaining the  $\Delta P_{\text{NH}_3}$  through the conversion of NH<sub>3</sub> to NH<sub>4</sub><sup>+</sup> upon entry into the USL.

Key words: ammonia transport, ammonia excretion, yolk, perivitelline fluid, pH, amiloride, acid unstirred layer, electrical potential, rainbow trout, *Oncorhynchus mykiss*.

### Introduction

The primary nutrients in oviparous teleost embryos are the yolk proteins (Kamler, 1992) and, consequently, nitrogenous wastes such as ammonia, urea and uric acid must be stored, recycled or excreted during embryonic development. The embryo consists of the fertilized egg containing the developing embryonic tissue and the attached yolk sac, a surrounding layer of perivitelline fluid (PVF), and an encasing acellular coat or chorion. Ammonia and urea accumulate steadily throughout embryonic development, but only ammonia excretion was detected in trout embryos prior to hatching (Smith, 1947; Rice and Stokes, 1974; Wright *et al.* 1995). Relatively low concentrations of uric acid were found within the embryos and no uric acid excretion was detected (Rice and Stokes, 1974).

There is no information in the literature, to our knowledge, on ammonia transport and distribution within the fish embryo. Ammonia movement across most biological membranes is primarily by NH<sub>3</sub> diffusion, down the partial pressure gradient

( $\Delta P_{\text{NH}_3}$ ). With a pK of approximately 9.5,  $P_{\text{NH}_3}$  will be higher in more alkaline tissue compartments, and NH<sub>3</sub> will therefore diffuse into more acidic compartments. The traditional 'diffusion trapping model' described by Pitts (1973) predicts that total ammonia concentration will be higher in more acidic tissues because NH<sub>3</sub> which diffuses in becomes protonated and trapped as NH<sub>4</sub><sup>+</sup>. This model assumes that NH<sub>4</sub><sup>+</sup> is essentially impermeable. Some teleost tissues, including rainbow trout white muscle (Wright *et al.* 1988b; Wright and Wood, 1988) and lemon sole (*Parophrys vetulus*) white muscle, heart and brain (Wright *et al.* 1988a), are permeable to both NH<sub>3</sub> and NH<sub>4</sub><sup>+</sup>. Whether NH<sub>4</sub><sup>+</sup> can also diffuse across either the yolk-sac epithelium or the chorion is unknown. It is possible, therefore, that the partitioning of ammonia within the embryo and across the chorion depends on both the electrochemical NH<sub>4</sub><sup>+</sup> gradient and the pH-dependent  $P_{\text{NH}_3}$  gradient.

In adult rainbow trout, ammonia excretion is influenced by

\*Author for correspondence: e-mail: patwright@uoguelph.ca.

the pH of the external bulk water (e.g. McDonald and Wood, 1981; Wright and Wood, 1985; Wilkie and Wood, 1991). There is an acid-water boundary layer next to the gills (Wright *et al.* 1986; Playle and Wood, 1989) which is maintained by CO<sub>2</sub> and H<sup>+</sup> excretion (Lin and Randall, 1990, 1991). Wright *et al.* (1989) demonstrated that the acid-water boundary layer enhanced blood-to-water NH<sub>3</sub> diffusion gradients and facilitated ammonia excretion in rainbow trout. Rombough (1988) proposed that an unstirred boundary layer (USL) is present around salmonid embryos, but whether it is acidic and influences ammonia excretion is unknown.

This study was designed to test the following hypotheses. (1) The primary mechanism of ammonia excretion from the embryo to the external environment is by diffusion of NH<sub>3</sub> down the partial pressure gradient. (2) The distribution of ammonia between the yolk and the PVF and between the PVF and the external water is dependent on the pH gradient between these fluid compartments. (3) The pH of the USL adjacent to the embryo is acidic relative to the bulk water.

Embryos were exposed to various external water conditions [pH 6.0, pH 10, 1.6 mmol l<sup>-1</sup> NaCl, 0.0 mmol l<sup>-1</sup> NaCl, 0.2 mmol l<sup>-1</sup> NH<sub>4</sub>Cl, 2.5 mmol l<sup>-1</sup> borax buffer (Na<sub>2</sub>B<sub>4</sub>O<sub>7</sub>·10 H<sub>2</sub>O), 2.5 mmol l<sup>-1</sup> Hepes and 0.1 mmol l<sup>-1</sup> amiloride] for 30 min. Ammonia concentrations and excretion rates to the environment were measured. The pH of the PVF, yolk and USL were determined using microelectrodes.

## Materials and methods

### Animals

Eyed-up rainbow trout [*Oncorhynchus mykiss* (Walbaum)] embryos of similar size (35–40 days post-fertilization, mass 0.10±0.00 g, mean ± S.E.M.) from 4-year-old female trout were purchased from Blue Spring Trout hatchery (Hanover, Ontario, Canada), Alma Research Station (Alma, Ontario, Canada) or Rainbow Springs Trout hatchery (Thamesford, Ontario, Canada). For the experiments performed in Guelph, the embryos were maintained in recirculating well water (total hardness=411 mg l<sup>-1</sup> as CaCO<sub>3</sub>, [Ca<sup>2+</sup>]=2.6 mequiv l<sup>-1</sup>, [Cl<sup>-</sup>]=1.47 mequiv l<sup>-1</sup>, [Mg<sup>2+</sup>]=1.49 mequiv l<sup>-1</sup>, [K<sup>+</sup>]=0.06 mequiv l<sup>-1</sup>, [Na<sup>+</sup>]=1.05 mequiv l<sup>-1</sup>) in an incubation tray (Heath) at 8 °C. For the experiments performed in Hamilton, the embryos were maintained at 8 °C in shallow plastic containers supplied with recirculated aerated dechlorinated tapwater (total hardness=100 mg l<sup>-1</sup> as CaCO<sub>3</sub>, [Ca<sup>2+</sup>]=1.0 mequiv l<sup>-1</sup>, [Cl<sup>-</sup>]=0.75 mequiv l<sup>-1</sup>, [Mg<sup>2+</sup>]=0.3 mequiv l<sup>-1</sup>, [K<sup>+</sup>]=0.03 mequiv l<sup>-1</sup>, [Na<sup>+</sup>]=0.6 mequiv l<sup>-1</sup>). On the day of the experiment, 50–75 embryos from each female were transported from the holding facility to the laboratory by placement in one of four 11 beakers containing aerated water (8 °C).

### Experimental treatments

Separate groups of embryos were exposed for 30 min (8 °C) to one of the following conditions: (1) control water 1 (Guelph) at pH 8.3; (2) elevated external [ammonia] (0.2 mmol l<sup>-1</sup> NH<sub>4</sub>Cl, Guelph) at pH 8.3; (3) control water 2 (Hamilton) at

pH 8.3; (4) low water pH of 6.0 (pH adjusted with 0.2 mol l<sup>-1</sup> H<sub>2</sub>SO<sub>4</sub>, Hamilton); (5) elevated external Na<sup>+</sup> concentration (1.0 mmol l<sup>-1</sup> NaCl was added to give a final calculated water Na<sup>+</sup> concentration of 1.6 mmol l<sup>-1</sup>, Hamilton) at pH 8.3; (6) buffered water I [2.5 mmol l<sup>-1</sup> borax (Na<sub>2</sub>B<sub>4</sub>O<sub>7</sub>·10H<sub>2</sub>O), Hamilton] at pH 8.3; (7) control water 3 (Guelph) at pH 8.3; (8) elevated water pH of 10.0 (pH adjusted with 0.1 mol l<sup>-1</sup> KOH; Guelph); (9) control water 4 (Guelph) at pH 7.8; (10) buffered water II (2.5 mmol l<sup>-1</sup> Hepes; Guelph) at pH 7.8; (11) control water 5 (formulated water: 0.6 mmol l<sup>-1</sup> NaCl, 0.3 mmol l<sup>-1</sup> MgCl<sub>2</sub>, 0.2 mmol l<sup>-1</sup> KHCO<sub>3</sub>, 1.6 mmol l<sup>-1</sup> CaSO<sub>4</sub>) at pH 8.3; (12) Na<sup>+</sup>-free water (0.6 mmol l<sup>-1</sup> choline chloride, 0.3 mmol l<sup>-1</sup> MgCl<sub>2</sub>, 0.2 mmol l<sup>-1</sup> KHCO<sub>3</sub>, 1.6 mmol l<sup>-1</sup> CaSO<sub>4</sub>) at pH 8.3; (13) control water 6 (Guelph) at pH 8.1; and (14) amiloride (0.1 mmol l<sup>-1</sup>, Guelph) at pH 7.9.

The water for each treatment was aerated vigorously for a minimum of 4 h before each experiment. For treatments 1–6, four sets of embryos were used in each experiment, each set of embryos produced by an individual 4-year-old female. For treatments 7–14, four subsets of embryos were used from a single 4-year-old female. The variability between embryos from different females was found to be similar to the variability between subsets of embryos from the same female. Consequently, in the ammonia excretion measurements for experiments 7–14 and for pH measurements from the boundary layer experiments, embryos were derived from one female but divided into four groups, where *N* is the number of repetitions. Treatments 7–14 were carried out after analysis of the results of treatments 1–6 and in order to study the mechanisms of ammonia excretion across the chorion. Consequently, in experiments 7–14, only ammonia excretion to the external water was measured.

### Ammonia excretion to the external water

Ammonia excretion was measured over the 30 min experimental treatment in four groups of 20 embryos placed in small glass beakers (40 ml) containing 8 ml of water (8 °C). Water was aerated for the duration of the experiment. Samples (8 ml) were collected at the start from the bulk water container and end of the experiment and immediately frozen at -20 °C for later determination of ammonia concentrations. The embryos were blotted dry and the wet mass was recorded. Excretion rates (in μmol-N g<sup>-1</sup> h<sup>-1</sup>) were calculated as the difference in ammonia concentration (0–30 min) (in μmol-N l<sup>-1</sup>) multiplied by the volume of the chamber (in l) divided by the mass of tissue (in g) and the time period (0.5 h).

### Collection of PVF and yolk samples

In a separate group of embryos exposed to the same experimental treatments, PVF and yolk samples were collected. At the end of the experiment, embryos were removed, blotted dry and then submerged in a Petri dish filled with mineral oil. PVF was collected under a dissecting microscope by making a small incision in the chorion of the embryo under oil with a 21 gauge syringe needle and carefully aspirating the resulting drop of PVF using a glass micropipette,

drawn over a flame from a 100  $\mu\text{l}$  disposable capillary tube. The fluid was then transferred to a 0.5 ml vial and was immediately frozen on dry ice. Samples from 20–40 embryos from the same female were pooled in a single vial to ensure a sufficient sample volume for ammonia analysis. Yolk samples were collected by holding the embryo in a pair of tweezers and then squeezing the embryo so that the yolk sac was in direct contact with the chorion along the bottom of the embryo. The embryo was then punctured under oil and with a 21 gauge syringe needle, to release the yolk, leaving the developing tissue and PVF still in the chorion. The yolk sample was then aspirated with a glass micropipette and placed in a separate 0.5 ml vial and immediately frozen on dry ice. For yolk ammonia measurements, samples from 3–6 embryos were pooled. The PVF and yolk samples were frozen at  $-80^\circ\text{C}$  and analyzed for ammonia within 1 week.

#### *Water, PVF and yolk ammonia analysis*

Water samples were analyzed for ammonia using the colorimetric assay described by Anderson *et al.* (1987). For PVF and yolk analysis, samples were thawed and immediately deproteinized with one and two volumes of ice-cold 8%  $\text{HClO}_4$ , respectively. Samples were centrifuged at 12 000  $g$  for 10 min at  $4^\circ\text{C}$ . The supernatant was neutralized with saturated  $\text{KHCO}_3$  and then centrifuged at room temperature ( $22^\circ\text{C}$ ) at 12 000  $g$  for 4 min. Ammonia concentration was determined on the neutralized supernatant (Sigma diagnostic kit 171-C).

#### *Measurement of pH of the PVF and yolk*

The construction and use of pH microelectrodes based on the neutral carrier tridodecylamine ( $\text{H}^+$  ionophore I, cocktail B, Fluka Chemical Corp., Ronkonkoma, NY, USA) have been described elsewhere (Maddrell *et al.* 1993; O'Donnell and Maddrell, 1995).

The pH of the PVF and yolk samples were measured under paraffin oil to prevent evaporation of the samples. The embryos were held with microforceps and punctured using a fine syringe needle (25 gauge). The pH and reference microelectrodes were positioned in the samples, and the electrical potential recorded. The pH was then calculated from the difference in electrical potential recorded between the sample and a calibration solution of known pH. Calibration solutions consisted of physiological saline adjusted to two pH values differing by 1 unit. Preliminary experiments showed that the pH microelectrodes were not sensitive to changes in ionic strength; the microelectrode potential changed by less than 1 mV when the electrode was transferred between physiological saline and fresh water buffered with  $1\text{ mmol l}^{-1}$  Hepes at the same pH.

Microelectrode measurements of the pH of intra- and extracellular fluids are typically reported to 0.01 pH unit because the reproducibility of such measurements is typically less than 0.01 pH unit (Amman, 1986).

#### *Measurement of pH and $[\text{NH}_4^+]$ of the boundary layer*

Double-barrelled pH and  $\text{NH}_4^+$ -selective microelectrodes

were constructed from unfilamented double-barrelled borosilicate glass tubing (1.2 mm o.d., 0.68 mm i.d.; A-M Systems, Inc., Everett, WA, USA). Tubing was acid-washed, dried on a hot plate at  $200^\circ\text{C}$  and pulled to tip diameters of less than  $1\text{ }\mu\text{m}$ . The micropipettes were then silanized as for single-barrelled electrodes. After silanization, one barrel was filled with the  $\text{H}^+$  ionophore and the other with ammonium ionophore based on 75% nonactin/25% monactin (Ammonium ionophore I, cocktail A, Fluka). Backfilling solutions for pH and  $\text{NH}_4^+$ -selective barrels were  $100\text{ mmol l}^{-1}$   $\text{NaCl}/100\text{ mmol l}^{-1}$  sodium citrate (pH 6.0) and  $1\text{ mol l}^{-1}$   $\text{NH}_4\text{Cl}$ , respectively.

The pH and  $\text{NH}_4^+$  concentrations of the water in the unstirred layer (USL) were measured within 10–20  $\mu\text{m}$  of the surface of the embryo, or in the bulk water (BW) at least 1 cm distant from the embryo. The measurements were achieved by measuring the potentials of both barrels with respect to a reference electrode filled with  $3\text{ mol l}^{-1}$   $\text{KCl}$  placed in the water at more than 1 cm distance from the embryo. Because distilled water typically contains approximately  $10^{-5}\text{ mol l}^{-1}$  ammonia, ammonia standards in the micromolar range were prepared by first passing distilled water through Dowex-50 (Sigma) ion-exchange resin to remove ammonia, then adding back known levels of ammonia and salts ( $0.5\text{ mmol l}^{-1}$   $\text{CaCl}_2$  and  $0.5\text{ mmol l}^{-1}$   $\text{Na}_2\text{CO}_3$ ). The concentrations of  $\text{CaCl}_2$  and  $\text{Na}_2\text{CO}_3$  were chosen to mimic Hamilton tap water (see above).

The pH and  $\text{NH}_4^+$  concentration in the USL and BW were measured as stated above in the control, pH 6.0 and buffer I experiments only. Measured total ammonia concentrations in the BW were used to calculate  $\text{NH}_4^+$  and  $P_{\text{NH}_3}$  in the  $\text{NH}_4\text{Cl}$  and  $\text{NaCl}$  experiments.

#### *Measurement of electrical potentials*

Double-barrelled micropipettes were pulled from thick septum theta glass (TST150, WPI, Sarasota, FL, USA). When both barrels were filled with  $3\text{ mol l}^{-1}$   $\text{KCl}$ , the resulting microelectrodes had tip resistances of 20–40  $\text{M}\Omega$ . The natural spear point and thick central septum of these microelectrodes facilitated impalement of the chorion. One barrel was connected to an electrometer (M707, WPI) through a chlorided silver wire. For measurement of perivitelline potentials, an embryo was first positioned under water in a hemispherical depression in a Sylgard-lined Petri dish. The chorion was then impaled by a microelectrode mounted on a hydraulic micromanipulator (Narishige, Tokyo) and then a second microelectrode was positioned in the water to serve as a reference. For measurement of vitelline potentials, a slit was made in the chorion with a 26 gauge syringe needle. One microelectrode was advanced into the PVF to serve as a reference, and the other was advanced across the yolk sac or vitelline membrane. All potentials were recorded on a computerized data acquisition system (Axotape, Burlingame, CA, USA).

#### *Evaluation of pK*

The accuracy of the ammonia gradient calculations between different compartments in the embryo depends largely on the

precision of the pH measurements and the use of the correct physical constants (Cameron and Heisler, 1983; Wright and Wood, 1985). Very little is known about the properties of PVF and yolk solutions in embryonic rainbow trout; therefore, a number of estimations were made on the basis of the available literature. We assumed that the composition of the PVF of rainbow trout embryos was similar to that of the Atlantic salmon *Salmo salar* [58–71 % water, 20–25 % protein, 5–12 % lipid and 1.0–1.7 % carbohydrate, with an osmolarity of approximately  $30 \text{ mosmol l}^{-1}$  ( $[\text{NaCl}] = 3\text{--}5 \text{ mmol l}^{-1}$ ); Rudy and Potts, 1969; Eddy, 1974; Hamor and Garside, 1977; Shephard and McWilliams, 1989] as both these salmonid embryos develop in fresh water. To our knowledge, there have been no published values for the constituents of trout PVF.

To determine the apparent pK of ammonia ( $\text{pK}'_{\text{amm}}$ ) in the PVF, a NaCl equivalent value of  $10 \text{ mmol l}^{-1}$  was used. This approximate value was based on the findings of Cameron and Heisler (1983) who reported that, in terms of  $\text{pK}'_{\text{amm}}$ , trout plasma behaved like a solution with twice the osmolarity that was actually measured (owing to the presence of dissolved ions, proteins and fatty components).

For the yolk, a value of  $370 \text{ mmol l}^{-1}$  NaCl equivalents was used to determine  $\text{pK}'_{\text{amm}}$ . Although the yolk contains a higher level of protein and lipid than trout plasma, the yolk of an ovulated egg is in osmotic equilibrium with the ovarian fluid, which has a similar osmotic concentration to the blood plasma (Hirano *et al.* 1978; Riis-Vestergaard, 1982). A further assumption was made that the osmolarity of the yolk remained fairly constant once the embryos were shed into the water because the yolk membrane is highly impermeable to water and  $\text{H}^+$  (Potts and Rudy, 1969). Moreover, the percentage water content of the whole embryo did not change in rainbow trout embryos from 8 days after fertilization to hatching at 11–13 °C (Wright *et al.* 1995).

#### Evaluation of ammonia solubility coefficients

Calculation of  $P_{\text{NH}_3}$  from  $\text{NH}_3$  concentration requires the  $\text{NH}_3$  solubility coefficient ( $\alpha_{\text{NH}_3}$ ), which depends on both temperature and ionic strength (Cameron and Heisler, 1983). To our knowledge, there are no data available for  $\alpha_{\text{NH}_3}$  values in other fish fluids such as PVF or yolk. It was assumed that PVF and yolk  $\text{NH}_3$  solubility coefficients ( $\alpha_{\text{NH}_3}$ ) were similar to those of rainbow trout plasma.

#### Calculations

$\text{NH}_4^+$  ( $\text{mmol l}^{-1}$ ) concentrations and the partial pressure of  $\text{NH}_3$  ( $P_{\text{NH}_3}$  in nmHg) were calculated as outlined by Wright and Wood (1985). Gradients ( $\Delta P_{\text{NH}_3}$  and  $\Delta P_{\text{NH}_4^+}$ ) between tissue compartments were then calculated as the difference in concentration or partial pressure between different compartments.

To determine whether ammonia was distributed according to the  $\text{H}^+$  distribution, it was assumed that  $\text{NH}_3$  concentration was equal in all compartments and, therefore, the  $P_{\text{NH}_3}$  in each compartment was set to the PVF  $P_{\text{NH}_3}$ . A predicted total ammonia concentration ( $T_{\text{amm}}$ ) was calculated for each

compartment by manipulation of the Henderson–Hasselbalch equation, using the measured pH for each compartment:

$$\text{predicted } T_{\text{amm}} = [\text{NH}_3] + \{[\text{NH}_3]/\text{antilog}(\text{measured pH} - \text{pK})\}. \quad (1)$$

The predicted  $T_{\text{amm}}$  was then compared with the measured  $T_{\text{amm}}$  for each compartment.

To determine whether the distribution of ammonia between the USL, PVF and yolk could be a function of the electrical potential across the yolk-sac membrane or chorion, and in agreement with the measured potentials, the ammonia equilibrium potential  $E_{\text{NH}_4^+}$  was calculated using the Nernst equation:

$$E_{\text{NH}_4^+} = \frac{RT}{zF} \times \ln([\text{NH}_4^+]_a/[\text{NH}_4^+]_b), \quad (2)$$

where  $R$  is the gas constant ( $8.314 \text{ V C K}^{-1} \text{ mol}^{-1}$ ),  $T$  is the absolute temperature (K),  $z$  is the charge on the solute,  $F$  is the Faraday constant ( $96\,500 \text{ C mol}^{-1}$ ) and  $a$  and  $b$  represent the USL and the PVF and yolk, respectively.

#### Statistics

Data are presented as means  $\pm 1$  S.E.M. In treatments 1–6,  $N=4$  represents pooled measurements on embryos from four separate females, and in treatments 7–14,  $N$  is the number of repetitions. Student's unpaired  $t$ -tests ( $P \leq 0.05$ ) were used to evaluate the significance of differences between means. A one-way analysis of variance (ANOVA) was performed to evaluate the difference between means for treatments where more than two treatments were compared with the same control treatment (i.e. control 2 *versus* pH 6.0,  $1.6 \text{ mmol l}^{-1}$  NaCl and  $2.5 \text{ mmol l}^{-1}$  borax buffer).

## Results

### pH of the unstirred water layer and internal tissue compartments

Under control conditions, the pH of the unstirred layer (USL) around the embryo was, on average ( $N=7$ ), 0.32 pH units acid to the bulk water pH (8.3). The pH of the PVF was approximately 7.17, whereas the yolk pH was considerably more acidic at 6.35–6.48 (Table 1).

Exposure to  $\text{NH}_4\text{Cl}$  resulted in a slight, but significant, decrease in the pH of the PVF, but no change in yolk pH (Fig. 1A). On exposure to an acidic (pH 6.0) external environment, the pH of the BW, USL and PVF were reduced compared with the control value, whereas the pH of the yolk was unchanged (Fig. 2). Elevated external  $[\text{NaCl}]$  did not change PVF pH, but resulted in a significant increase in yolk pH (Fig. 3A). The addition of borax buffer to the external water effectively eliminated the acid boundary layer, did not change PVF pH, but resulted in a significant elevation of yolk pH (Fig. 4A).

### Partitioning of ammonia

Total ammonia concentration ( $T_{\text{amm}}$ ) and  $\text{NH}_4^+$  concentration were 4–5 times higher in the yolk than in the

Table 1. A comparison of pH and measured and predicted total ammonia concentrations in the yolk, perivitelline fluid and unstirred layer based on the  $P_{\text{NH}_3}$  value of the perivitelline fluid

|           | Measured          |                    | Predicted                                          |                                                     | Measured                                            |                   | Predicted                                          |                                                    |
|-----------|-------------------|--------------------|----------------------------------------------------|-----------------------------------------------------|-----------------------------------------------------|-------------------|----------------------------------------------------|----------------------------------------------------|
|           | pH <sub>PVF</sub> | pH <sub>yolk</sub> | $T_{\text{amm}}$<br>PVF<br>(mmol l <sup>-1</sup> ) | $T_{\text{amm}}$<br>yolk<br>(mmol l <sup>-1</sup> ) | $T_{\text{amm}}$<br>yolk<br>(mmol l <sup>-1</sup> ) | pH <sub>USL</sub> | $T_{\text{amm}}$<br>USL<br>(mmol l <sup>-1</sup> ) | $T_{\text{amm}}$<br>USL<br>(mmol l <sup>-1</sup> ) |
| Control 1 | 7.18±0.03         | 6.48±0.04          | 0.48±0.03                                          | 3.34±0.21                                           | 3.71±0.21                                           | 7.98±0.02         | 0.05±0.01                                          | 0.07±0.00                                          |
| Control 2 | 7.17±0.02         | 6.35±0.04          | 0.41±0.04                                          | 1.87±0.11                                           | 4.15±0.36*                                          | 7.98±0.02         | 0.05±0.01                                          | 0.06±0.01                                          |

Values are means ± S.E.M.,  $N=4$ , except for pH<sub>USL</sub> where  $N=7$ .

$T_{\text{amm}}$ , total ammonia concentration; PVF, perivitelline fluid; USL, unstirred layer;  $P_{\text{NH}_3}$ , partial pressure of ammonia.

\*Significantly different from measured value  $P \leq 0.05$ .

Bulk water pH in control 1 and 2 was  $8.3 \pm 0.1$ ; see Materials and methods for further details.

PVF (Figs 1B, 2B and Figs 1C, 2C, respectively). A positive concentration gradient existed for  $\text{NH}_4^+$  from the yolk to the PVF and from the PVF to the USL (Figs 1C, 2C). In control 1 embryos, there was no difference between  $P_{\text{NH}_3}$  in the PVF and yolk (Fig. 1D), whereas a positive  $P_{\text{NH}_3}$  gradient from the PVF to the yolk was present in control 2 embryos (Fig. 2D). There were no significant differences between  $P_{\text{NH}_3}$  levels in the PVF, USL or BW for either control 1 or 2 embryos (Figs 1D, 2D; note the difference between axis scales).

Predicted yolk  $T_{\text{amm}}$  was not significantly different from measured yolk  $T_{\text{amm}}$  in the control 1 group, but was significantly greater in the control 2 experiment (Table 1). In both control experiments, predicted USL  $T_{\text{amm}}$  values were not significantly different from measured values (Table 1).

Calculated  $E_{\text{NH}_4^+}$  values were not significantly different from measured membrane potential ( $E_{\text{M}}$ ) across the yolk-sac epithelium (yolk-PVF). However, calculated  $E_{\text{NH}_4^+}$  values differed significantly from measured  $E_{\text{M}}$  values across the chorion (PVF-USL) (Table 2).

#### Influence of external water conditions on ammonia excretion

Under control conditions, ammonia excretion rate ranged between  $0.10$  and  $0.13 \mu\text{mol-N g}^{-1} \text{h}^{-1}$  (Figs 1E, 2E). High external ammonia levels eliminated, and in fact reversed, ammonia excretion rates (Fig. 1E). There was a significant increase in the PVF  $T_{\text{amm}}$  and  $[\text{NH}_4^+]$ , but not in  $P_{\text{NH}_3}$  (Fig. 1B–D). Although  $\text{NH}_4^+$  levels in the USL and BW were not directly measured in this experiment, the amount of  $\text{NH}_3$  and  $\text{NH}_4^+$  in the BW was calculated using the measured pH and total ammonia levels. The resulting calculations demonstrated a large positive BW-to-PVF  $P_{\text{NH}_3}$  gradient (Fig. 1D), but  $T_{\text{amm}}$  in the BW was lower than in either the yolk or the PVF (Fig. 1B).

Ammonia excretion rate increased twofold in embryos exposed to pH 6.0 water (Fig. 2E). Exposure of the embryo to a low pH significantly decreased  $T_{\text{amm}}$  and the  $\text{NH}_4^+$  concentrations of the yolk (Fig. 2B,C). There were no changes, however, in the directions of the  $\text{NH}_4^+$  gradients (Fig. 2C). At water pH 6.0,  $P_{\text{NH}_3}$  values decreased significantly in the PVF, USL and BW (Fig. 2D). Consequently, the  $P_{\text{NH}_3}$  gradient was reversed; that is, from yolk to PVF and from PVF to USL.

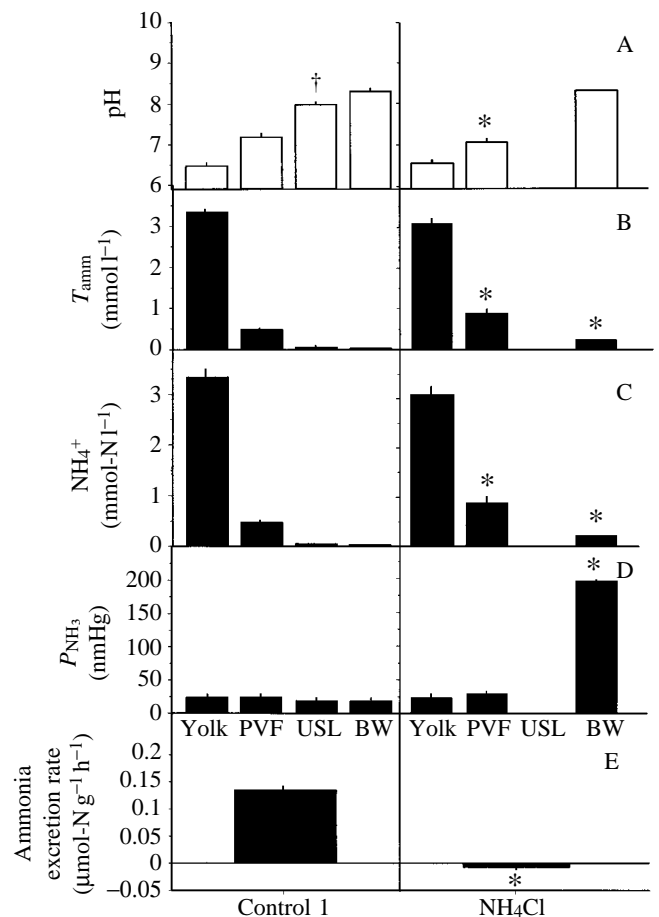

Fig. 1. A comparison between rainbow trout embryos exposed to control water 1 (see Materials and methods) of pH 8.3 or elevated external ammonia levels ( $0.2 \text{ mmol l}^{-1} \text{ NH}_4\text{Cl}$ , pH 8.3). (A) pH; (B) total ammonia-N concentration ( $T_{\text{amm}}$ ); (C)  $[\text{NH}_4^+]$ ; (D) partial pressure of  $\text{NH}_3$  ( $P_{\text{NH}_3}$ ); (E) ammonia excretion rates. Asterisks represent significant differences ( $P \leq 0.05$ ) between control and experimental values for the same experiment. Values are given as the mean + 1 S.E.M. ( $N=4$ ). Daggers represent significant differences ( $P \leq 0.05$ ) between the USL and BW pH within the control experiment. PVF, perivitelline fluid; USL, unstirred layer; BW, bulk water. The pH and ammonia concentrations in the USL were not measured for the elevated ammonia treatment.  $P_{\text{NH}_3}$  and  $[\text{NH}_4^+]$  in the BW were calculated from measured total ammonia concentrations. See Materials and methods for details.

Table 2. Measured membrane potential and calculated ammonium equilibrium potential between the unstirred layer and the perivitelline fluid and the perivitelline fluid and the yolk

|           | Measured<br>$E_M$<br>PVF-USL<br>(mV) | Calculated<br>$E_{NH_4^+}$<br>PVF-USL<br>(mV) | Measured<br>$E_M$<br>Yolk-PVF<br>(mV) | Calculated<br>$E_{NH_4^+}$<br>Yolk-PVF<br>(mV) |
|-----------|--------------------------------------|-----------------------------------------------|---------------------------------------|------------------------------------------------|
| Control 1 | -35.8±1.4                            | -53.9±2.3*                                    | -41.8±4.8                             | -47.1±0.9                                      |
| Control 2 | -35.8±1.4                            | -49.9±2.3*                                    | -41.8±4.8                             | -37.2±2.1                                      |
| Mean      | -35.8                                | -51.9                                         | -41.8                                 | -42.0                                          |

\*Significantly different from measured  $E_m$   $P \leq 0.05$ .

USL, unstirred layer; PVF, perivitelline fluid;  $E_M$ , membrane potential;  $E_{NH_4^+}$ , ammonium equilibrium potential.

See Materials and methods for details of control water composition.

Exposure of the embryos to elevated NaCl levels increased ammonia excretion rates twofold (Fig. 3E). Elevated [NaCl] did not significantly affect  $T_{amm}$  (Fig. 3B) or  $NH_4^+$  level (Fig. 3C). There was, however, a significant increase in the  $P_{NH_3}$  value in the yolk (Fig. 3D).

Embryos exposed to buffered water I (2.5 mmol l<sup>-1</sup> Na<sub>2</sub>B<sub>4</sub>O<sub>7</sub>·10H<sub>2</sub>O) showed a significant increase in ammonia excretion rate (Fig. 4E) and a significant decrease in  $T_{amm}$  and the  $NH_4^+$  concentrations of the yolk (Fig. 4B,C). There was no change in the direction of the  $NH_4^+$  gradient (Fig. 4C).

At water pH 10, ammonia excretion rates were significantly reduced compared with control values (-63%; Fig. 5A). Exposure to buffered water II (2.5 mmol l<sup>-1</sup> Hepes) reduced ammonia excretion rate by 50% (Fig. 5B). Exposing the embryos to Na<sup>+</sup>-free water (Fig. 5C) or to 0.1 mmol l<sup>-1</sup> amiloride (Fig. 5D) did not significantly alter ammonia excretion rates in intact embryos. We repeated the amiloride experiment on embryos in which a small hole had been made in the chorion to allow for more rapid exchange between the PVF and BW. As in intact embryos, 0.1 mmol l<sup>-1</sup> amiloride had no significant effect on ammonia excretion rate (control 0.056±0.004 μmol-N g<sup>-1</sup> h<sup>-1</sup> versus amiloride 0.051±0.003 μmol-N g<sup>-1</sup> h<sup>-1</sup>).

## Discussion

### An acidic unstirred water layer surrounds the trout embryo

The pH of the unstirred boundary layer around teleost embryos has not been determined previously. The existence of an acidic unstirred layer next to the chorion (0.32 pH units lower than the bulk water) is similar to that estimated for adult rainbow trout gills (Wright *et al.* 1986; Playle and Wood, 1989; Playle *et al.* 1990). Compared with the gills, however, water is not continually renewed over the surface of the embryo. In fact, water surrounding the embryo may be relatively stagnant, as trout embryos may be buried in several inches of gravel (Orcutt *et al.* 1961).

In adult trout, the pH of the unstirred layer of the gills is determined by the rate of CO<sub>2</sub> and H<sup>+</sup> excretion (which result in a decrease in water pH) and NH<sub>3</sub> excretion (which results in an increase in water pH; Lin and Randall, 1990, 1991). Since the chorion is permeable to these molecules and oxidation of proteins is the main source of energy in embryos, we assume that the rates of CO<sub>2</sub>, H<sup>+</sup> and NH<sub>3</sub> excretion together with the water buffering capacity determine the final pH of the unstirred layer next to the chorion in embryos.

We propose that the acid unstirred layer next to the chorion facilitates NH<sub>3</sub> excretion by maintaining the  $P_{NH_3}$  gradient, as in adult rainbow trout gills (Wright *et al.* 1989). As NH<sub>3</sub> is excreted across the chorion into the USL, NH<sub>3</sub> combines with H<sup>+</sup> to form NH<sub>4</sub><sup>+</sup>. Total ammonia levels were higher in the unstirred layer than in the bulk water; therefore, only by reducing the pH of the USL can  $P_{NH_3}$  in the USL be minimized. It should be noted that calculated  $P_{NH_3}$  values in the PVF and USL were essentially the same under control conditions (Figs 1D, 2D); however, only a very small gradient would be necessary to maintain NH<sub>3</sub> diffusion.

The addition of borax buffer effectively eliminated the acid

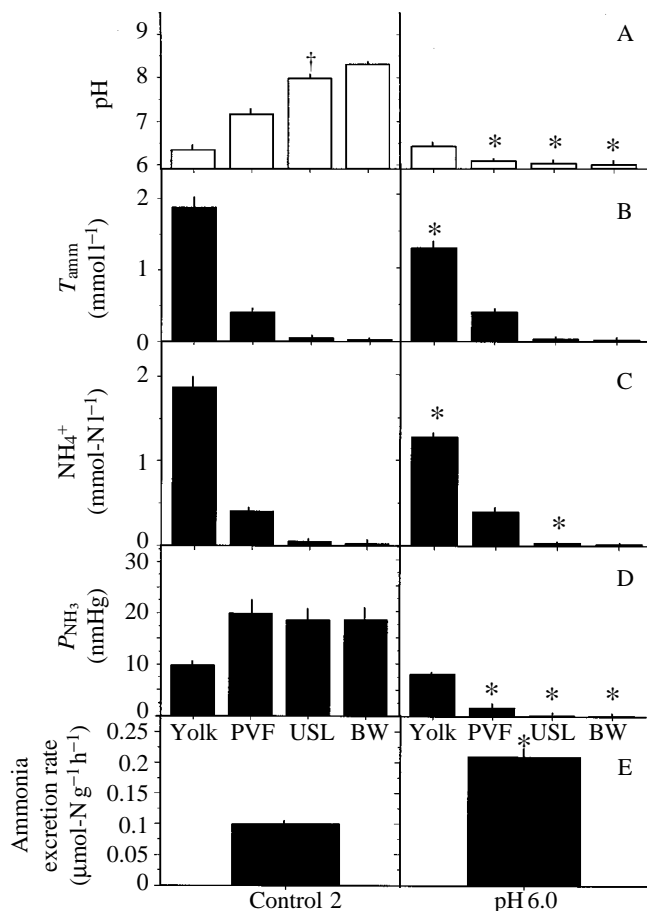

Fig. 2. A comparison between rainbow trout embryos exposed to control water 2 (see Materials and methods) at pH 8.3 or pH 6.0. (A) pH; (B) total ammonia-N concentration ( $T_{amm}$ ); (C)  $[NH_4^+]$ ; (D) partial pressure of  $NH_3$  ( $P_{NH_3}$ ); (E) ammonia excretion rates. See Fig. 1 for details.

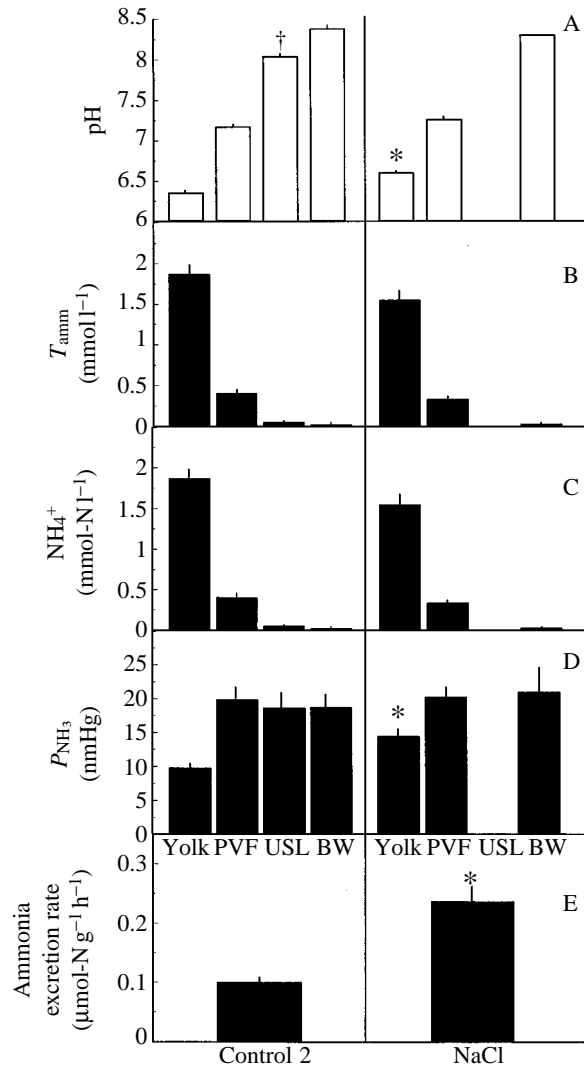

Fig. 3. A comparison between rainbow trout embryos exposed to control water 2 (see Materials and methods) of pH 8.3 or elevated external NaCl levels ( $1.6 \text{ mmol l}^{-1}$ , pH 8.3). (A) pH; (B) total ammonia-N concentration ( $T_{\text{amm}}$ ); (C)  $[\text{NH}_4^+]$ ; (D) partial pressure of  $\text{NH}_3$  ( $P_{\text{NH}_3}$ ); (E) ammonia excretion rates. See Fig. 1 for details. For the NaCl experiment, pH and ammonia values were not measured in the USL. In addition, BW  $[\text{NH}_4^+]$  and  $P_{\text{NH}_3}$  were calculated from measured total ammonia concentrations (see Material and methods for further details).

USL (Fig. 4A), but we did not observe the expected decrease in ammonia excretion rate, possibly because of the fivefold elevation in external  $\text{Na}^+$  levels (see below). The addition of a non- $\text{Na}^+$ -based buffer, Hepes, resulted in the expected decrease in ammonia excretion rates (Fig. 5B), providing evidence for the influence of the acid USL on  $\text{NH}_3$  diffusion.

In the adult rainbow trout, the presence of the enzyme carbonic anhydrase (CA) on the external surface of the gill catalyses the  $\text{CO}_2$  hydration reaction as  $\text{CO}_2$  is excreted across the gill epithelium into the environment (Wright *et al.* 1986). Thus, protons from the  $\text{CO}_2$  hydration reaction are readily

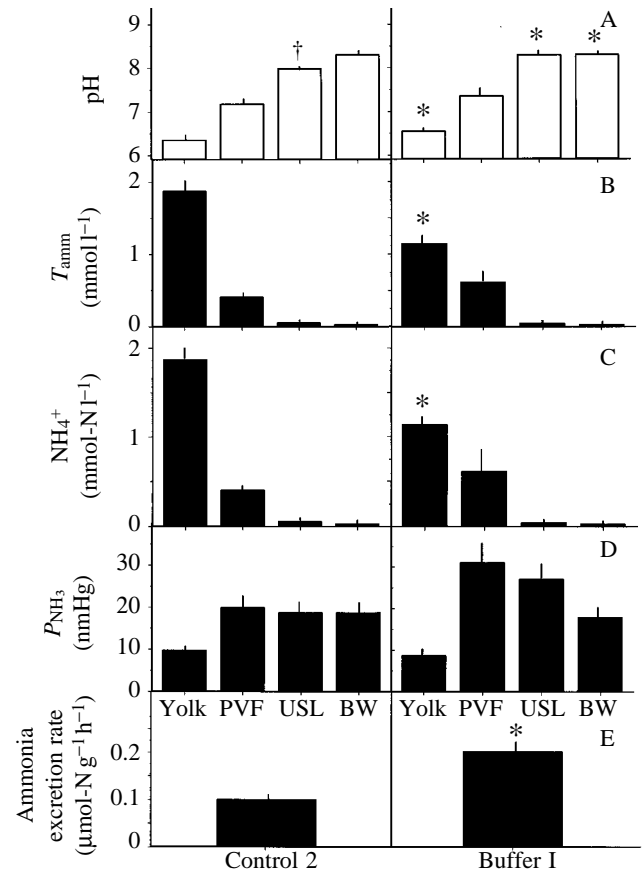

Fig. 4. A comparison between rainbow trout embryos exposed to control water 2 (see Materials and methods) at pH 8.3 or buffered water I ( $2.5 \text{ mmol l}^{-1} \text{ Na}_2\text{B}_4\text{O}_7$ , pH 8.3). (A) pH; (B) total ammonia-N concentration ( $T_{\text{amm}}$ ); (C)  $[\text{NH}_4^+]$ ; (D) partial pressure of  $\text{NH}_3$  ( $P_{\text{NH}_3}$ ); (E) ammonia excretion rates. See Fig. 1 for details.

available for the  $\text{NH}_3$  protonation reaction, thereby establishing a linkage between  $\text{CO}_2$  and  $\text{NH}_3$  excretion (Wright *et al.* 1989). It is not known whether CA is present on the external surface of the embryo; however, this seems unlikely since the chorion is an acellular layer. The uncatalysed  $\text{CO}_2$  reaction is relatively slow, with a half-time of the order of minutes (Kern, 1960) at typical fish water pH and temperatures. Regardless of the presence or absence of CA, the USL is acidic relative to the BW, and the rate of ammonia excretion appears to be dependent on the maintenance of an acidic USL in trout embryos (see above).

#### Partitioning of ammonia between the yolk, PVF and USL

If  $\text{NH}_4^+$  transfer across the chorion is negligible, and ammonia distribution is solely dependent on  $P_{\text{NH}_3}$  gradients, then one would expect the PVF-to-USL ammonia distribution to follow the  $\text{H}^+$  distribution, as for other weak acids and bases with impermeant ion forms. Indeed, the distribution of ammonia between the USL and PVF is in agreement with the  $\text{H}^+$  distribution because predicted USL  $T_{\text{amm}}$  was not significantly different from measured USL  $T_{\text{amm}}$  in both

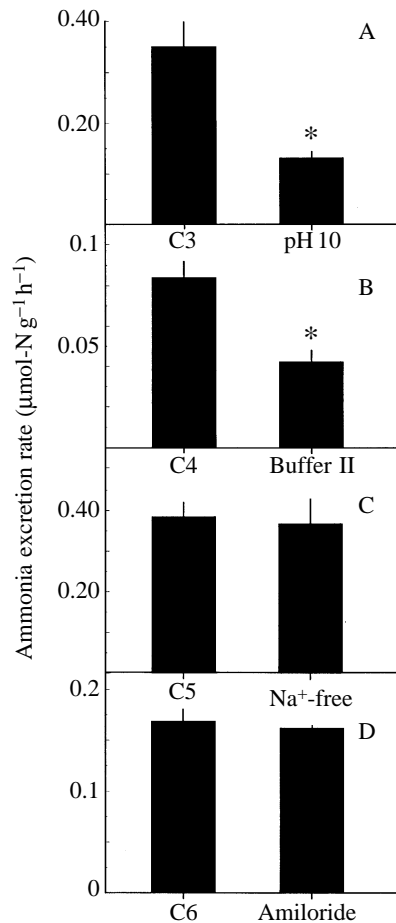

Fig. 5. Ammonia excretion rates in embryos exposed to (A) control 3 (C3) water (pH 8.3) or alkaline water (pH 10); (B) control 4 (C4) (pH 7.8) or buffered water II (2.5 mmol l<sup>-1</sup> Hepes) at pH 7.8; (C) control 5 (C5) (pH 8.3) or 0.0 mmol l<sup>-1</sup> NaCl (pH 8.3); (D) control 6 (C6) (pH 8.1) or 0.1 mmol l<sup>-1</sup> amiloride (pH 7.9). Asterisks indicate that the experimental values were significantly different from the control measurements ( $P \leq 0.05$ ). Values are means + S.E.M.,  $N=4$ . See Materials and methods for further details.

control 1 and 2 groups (Table 1). In addition, the calculated  $E_{\text{NH}_4^+}$  between the USL and PVF was substantially more negative than the measured  $E_M$  (Table 2), indicating that the  $\text{NH}_4^+$  concentration was higher than that expected on the basis of the Nernst equilibrium across the chorion. Hence, it is probable that  $\text{NH}_3$  is the dominant species of ammonia moving across the embryo under control conditions, whereas  $\text{NH}_4^+$  is relatively impermeable.

Several researchers have reported that isolated chorions or intact embryos of freshwater teleosts are ion-selective (Eddy and Talbot, 1985; Peterson and Martin-Robichaud, 1987; Shephard and McWilliams, 1989). Both the chorion and the PVF contain negatively charged macromolecules (Peterson and Martin-Robichaud, 1986), and therefore the embryo can be compared with an 'ion exchanger' that has a distinct influence on electrolyte diffusion (Rudy and Potts, 1969; Peterson and Martin-Robichaud, 1986; Shephard and

McWilliams, 1989). Moreover, Shephard and McWilliams (1989) reported that  $\text{K}^+$  and  $\text{Na}^+$  activities were not in equilibrium across the chorion of *Salmo salar* embryos.  $\text{NH}_4^+$  has the same charge and hydrated ionic radius as  $\text{K}^+$  and should mimic  $\text{K}^+$  (Knepper *et al.* 1989). Hence, various published studies lend support to our conclusion that  $\text{NH}_4^+$  is relatively impermeable across the chorion and that this may be due to properties of the chorion, the PVF or both.

If the yolk-sac membrane is relatively permeable to  $\text{NH}_4^+$ , then one would expect ammonia to be distributed between the yolk and the PVF according to the electrical potential and not the  $\text{H}^+$  distribution. This was partly the case. The calculated  $E_{\text{NH}_4^+}$  was approximately equal to the measured  $E_M$  between the PVF and yolk (Table 2), supporting the conclusion that  $\text{NH}_4^+$  was in equilibrium across the membrane.

The pH gradient data were not as clear. In the control 2 experiment, the predicted yolk  $T_{\text{amm}}$  was significantly higher than the measured yolk  $T_{\text{amm}}$  (Table 1), indicating that ammonia was not distributed according to the  $\text{H}^+$  distribution. The results discussed so far indicate that the yolk membrane is relatively permeable to  $\text{NH}_4^+$ . In the control 1 experiment, however, the predicted yolk  $T_{\text{amm}}$  was not significantly different from the measured  $T_{\text{amm}}$ , indicating that ammonia was distributed across the yolk membrane according to the  $\text{H}^+$  distribution (Table 1). The discrepancy between the control 1 and 2 data may not be so surprising if one considers that the differences between measured and predicted values in the two control experiments were not that great compared with previous studies in fish tissues (Wright *et al.* 1988a). In rainbow trout muscle and lemon sole muscle, heart and brain the ratio of measured:predicted  $T_{\text{amm}}$  was between 7 and 18 (Wright and Wood, 1988; Wright *et al.* 1988a) compared with only 0.45 in the present study.

#### Mechanisms of ammonia excretion

Our findings support the hypothesis that ammonia is excreted, in part, by  $\text{NH}_3$  diffusion down the  $P_{\text{NH}_3}$  gradient (Fig. 6). In most cases, changes in the  $P_{\text{NH}_3}$  gradients, but not the  $\text{NH}_4^+$  gradients, were positively correlated with changes in ammonia excretion rate. Ammonia excretion was completely inhibited by high external ammonia levels, although the total external ammonia concentration was lower than that in either the PVF or the yolk. The  $P_{\text{NH}_3}$  gradient in this case, however, was reversed; that is, from the BW to the PVF. In contrast, the  $\text{NH}_4^+$  concentration gradient from the yolk to the BW was positive, which indicates that  $\text{NH}_4^+$  diffusion was not the main mechanism of ammonia excretion under these conditions. [It should be noted that the data do not allow us to differentiate between excretion directly from the embryo to the PVF (and to the external medium) or from the embryo to the yolk and from the yolk to the PVF (and to the external medium) (Fig. 6). Amino acid deamination probably occurs primarily in the developing embryonic liver, as in adult teleosts (Forster and Goldstein, 1969). The yolk syncytium surrounding the yolk sac is responsible for the release of yolk metabolites (Heming and Buddington, 1988). The yolk itself



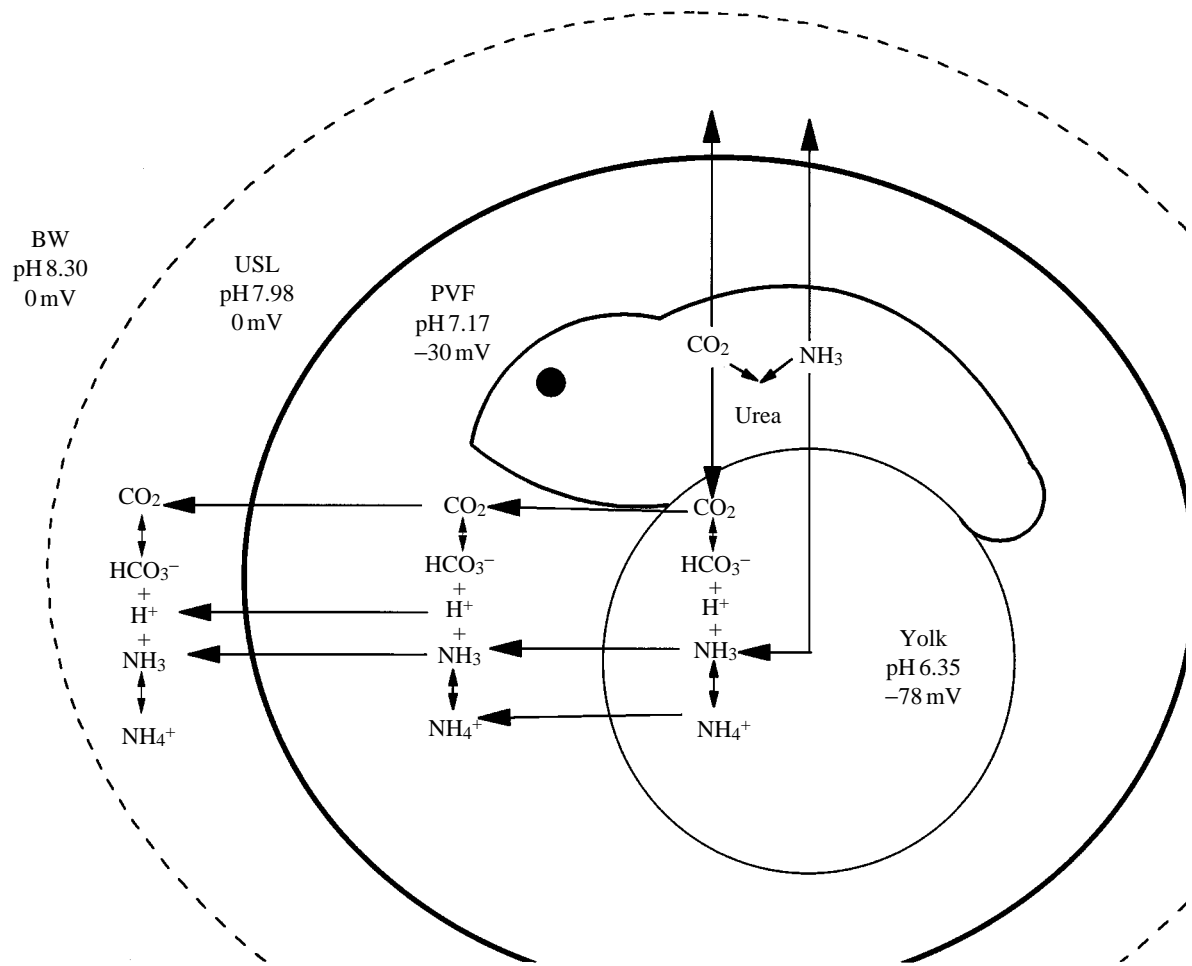

Fig. 6. A model proposed for ammonia excretion from the embryo to the environment under control conditions. BW, bulk water; USL, unstirred layer; PVF, perivitelline fluid. The figure is not drawn to scale. Excretion pathways may be directly from the yolk to the PVF to the USL and/or from the embryo to the PVF to the USL. For simplicity, excretion pathways are drawn only from the yolk. Although there are no published data on the permeability of the chorion to  $\text{HCO}_3^-$ , it is likely that the majority of carbon dioxide exits the embryo to the external medium as  $\text{CO}_2$ , as in adult fish (Perry, 1986). In addition, Shephard and McWilliams (1989) reported that  $\text{Cl}^-$  is less permeable across the chorion than is  $\text{H}^+$  or  $\text{K}^+$ . Although direct measurements of  $\text{HCO}_3^-$  permeability are beyond the scope of this paper, our model assumes that  $\text{HCO}_3^-$  permeability is similar to that of  $\text{Cl}^-$  and much less than that of  $\text{CO}_2$ . Clearly, these assumptions need to be validated with experimental measurements. Our data indicate that the yolk membrane and/or the embryo are relatively impermeable to  $\text{H}^+$  compared with the chorion. In contrast, the yolk membrane and/or embryo are relatively permeable to  $\text{NH}_4^+$  compared with the chorion.

also possesses enzymes (Hamor and Garside, 1977) that may be involved in the breakdown of the yolk. Thus, the specific site(s) of ammonia production has yet to be defined in fish embryos.]

Acidification of the external water increased the  $P_{\text{NH}_3}$  gradient from the yolk to the PVF and from the PVF to the unstirred water layer, while the  $\text{NH}_4^+$  gradient was unchanged or even decreased. The 100% increase in ammonia excretion rate, therefore, indicates that a significant proportion of ammonia was excreted as  $\text{NH}_3$  under these conditions.

Exposure of the embryos to severely alkaline water (pH 10) also decreased ammonia excretion rate. This reduction presumably reflects a change in the  $P_{\text{NH}_3}$  gradient between BW and PVF. High external pH is also known to inhibit or greatly reduce ammonia excretion in hatched embryos and alevin

(P. A. Wright and M. Land, in preparation) and adult rainbow trout (Wright and Wood, 1985; Wilkie and Wood, 1991; Yesaki and Iwama, 1992). Furthermore, elimination of the acid USL by addition of a strong buffer (Hepes) to the external water presumably reduced the  $P_{\text{NH}_3}$  gradient from PVF to USL, resulting in 50% inhibition of ammonia excretion. Taken together, these data indicate that  $\text{NH}_3$  plays a dominant role in ammonia excretion in embryos of rainbow trout.

It is interesting to note that our calculations of  $P_{\text{NH}_3}$  values for yolk and PVF were very similar to those calculated by Cameron and Heisler (1983) and by Wright and Wood (1985) for adult rainbow trout plasma. Under control conditions, adult rainbow trout have a  $P_{\text{NH}_3}$  diffusion gradient from blood to water of 38–57 nmHg (Wright and Wood, 1985). In the present study, gradients between different compartments

(yolk, PVF, USL and BW) in and around the embryo were 1–45 nmHg. The diffusion pathway across the gills of adult trout may be more complex compared with the diffusion pathway across the yolk membrane and the chorion in embryonic trout. Both the adult and embryo, however, are exposed to the same external environment and must eliminate ammonia to prevent toxic levels from accumulating in the tissues. Hence, it may not be too surprising that the gradient for NH<sub>3</sub> diffusion is of the same order of magnitude in the embryo and adult.

A Na<sup>+</sup>/H<sup>+</sup>(NH<sub>4</sub><sup>+</sup>) exchange has been proposed for juvenile steelhead trout (Bradly and Rourke, 1985) and adult rainbow trout (Wright and Wood, 1985; McDonald and Prior, 1988). Wilson *et al.* (1994) and Avella and Bornancin (1989), however, have rejected the hypothesis that NH<sub>4</sub><sup>+</sup> excretion is directly linked to Na<sup>+</sup> uptake at the gills of rainbow trout. If a Na<sup>+</sup>-dependent NH<sub>4</sub><sup>+</sup> transport system [e.g. a Na<sup>+</sup>/H<sup>+</sup>(NH<sub>4</sub><sup>+</sup>) exchanger] were involved in ammonia excretion from the embryo to the external water (i.e. on the embryo and/or yolk-sac membrane), an increase or decrease in external [Na<sup>+</sup>] should result in a corresponding change in ammonia excretion rate. In addition, exposure to amiloride, an inhibitor of the Na<sup>+</sup>/H<sup>+</sup>(NH<sub>4</sub><sup>+</sup>) transporter and Na<sup>+</sup> channels, should significantly reduce ammonia excretion rate. Exposure of embryos to elevated NaCl levels resulted in a twofold increase in ammonia excretion rate, providing evidence for some involvement of Na<sup>+</sup> in ammonia excretion. However, ammonia excretion was not significantly affected by the removal of Na<sup>+</sup> from the external water or by amiloride treatment. Hence, it is unlikely that a Na<sup>+</sup>/H<sup>+</sup>(NH<sub>4</sub><sup>+</sup>) transporter is directly involved in ammonia excretion. We do not know, however, whether the effect of Na<sup>+</sup> on ammonia excretion is related to changes in pH or *E<sub>M</sub>*, or has general effects on embryo health.

In summary, we propose that ammonia is primarily excreted by NH<sub>3</sub> diffusion down the *P*<sub>NH<sub>3</sub></sub> gradient (Fig. 6). Some ammonia may be converted to urea *via* the ornithine–urea cycle or uricolytic pathways (Dépêche *et al.* 1979; Wright *et al.* 1995). In a companion study, we have found that urea levels in the yolk are considerably higher than in the PVF and that urea-N excretion accounts for between 20 and 50% of total nitrogen excretion (ammonia-N + urea-N) in trout embryos (E. Rahaman-Noronha, M. J. O'Donnell, K. Moore and P. A. Wright, in preparation). Thus, nitrogen excretion in rainbow trout embryos is not simply accomplished by ammonia elimination, as was previously thought (Smith, 1947; Rice and Stokes, 1974; Wright *et al.* 1995), but also involves the more chemically complex nitrogen end-product urea.

The authors would like to thank Dr Gord McDonald, McMaster University, and Dr Moira Ferguson and Dr Roy Danzmann, University of Guelph, for their generous donation of wet laboratory space. We are also grateful to Dr Norbert Heisler for helpful comments of a technical nature early in the study. This study was funded by research grants from the Natural Sciences and Engineering Research Council to P.A.W. and M.J.O.

## References

- AMMANN, D. (1986). *Ion-selective Microelectrodes. Principles, Design and Applications*. Berlin: Springer-Verlag. 346pp.
- ANDERSON, P. M., JOHNSON, W. V., ENDRIZZI, J. A., LITTLE, R. M. AND KORTE, J. J. (1987). Interaction of mono- and dianions with cyanase: evidence for apparent half-site-binding. *Biochemistry* **26**, 3938–3943.
- AVELLA, M. AND BORNANCIN, M. (1989). A new analysis of ammonia and sodium transport through the gills of the freshwater rainbow trout (*Salmo gairdneri*). *J. exp. Biol.* **142**, 155–175.
- BRADLY, T. M. AND ROURKE, A. W. (1985). The influences of addition of minerals to rearing water and smoltification on selected blood parameters of juvenile steelhead trout, *Salmo gairdneri* Richardson. *Physiol. Zool.* **58**, 312–319.
- CAMERON, J. N. AND HEISLER, N. (1983). Studies of ammonia in the rainbow trout: physico-chemical parameters, acid–base behaviour and respiratory clearance. *J. exp. Biol.* **105**, 107–125.
- DÉPÊCHE, J., GILLES, R., DAUFRESNE, S. AND CHIAPELLO, H. (1979). Urea content and urea production *via* the ornithine–urea cycle pathway during the ontogenic development of two teleost fishes. *Comp. Biochem. Physiol.* **63A**, 51–56.
- EDDY, F. B. (1974). Osmotic properties of the perivitelline fluid and some properties of the chorion of Atlantic salmon eggs (*Salmo salar*). *J. Zool., Lond.* **174**, 237–243.
- EDDY, F. B. AND TALBOT, C. (1985). Sodium balance in eggs and dechorionated embryos of the Atlantic salmon (*Salmo salar* L.) exposed to zinc, aluminium and acid waters. *Comp. Biochem. Physiol.* **81C**, 259–266.
- FORSTER, R. P. AND GOLDSTEIN, L. (1969). Formation of excretory products. In *Fish Physiology*, vol. I (ed. W. S. Hoar and D. J. Randall), pp. 313–350. New York: Academic Press.
- HAMOR, T. AND GARSIDE, E. T. (1977). Size relations and yolk utilization in embryonated ova and alevins of Atlantic salmon *Salmo salar* L. in various combinations of temperature and dissolved oxygen. *Can. J. Zool.* **55**, 1892–1898.
- HEMING, T. A. AND BUDDINGTON, R. K. (1988). Yolk absorption in embryonic and larval fishes. In *Fish Physiology*, vol. X1A (ed. W. S. Hoar and D. J. Randall), pp. 407–446. New York: Academic Press.
- HIRANO, T., MORISAWA, M. AND SUSUKI, K. (1978). Changes in plasma and coelomic fluid composition of the mature salmon (*Oncorhynchus keta*) during fresh water adaptation. *Comp. Biochem. Physiol. A* **61**, 5–8.
- KAMLER, E. (1992). *Early Life History of Fish: An Energetics Approach*. London: Chapman & Hall.
- KERN, D. M. (1960). The hydration of carbon dioxide. *J. Chem. Ed.* **37**, 14–23.
- KNEPPER, M. A., PACKER, R. AND GOOD, D. W. (1989). Ammonium transport in the kidney. *Physiol. Rev.* **69**, 179–249.
- LIN, H. AND RANDALL, D. J. (1990). The effect of varying water pH on the acidification of expired water in rainbow trout. *J. exp. Biol.* **149**, 149–160.
- LIN, H. AND RANDALL, D. J. (1991). Evidence for the presence of an electrogenic proton pump on the trout gill epithelium. *J. exp. Biol.* **161**, 119–134.
- MADRELL, S. H. P., O'DONNELL, M. J. AND CAFFREY, R. (1993). The regulation of haemolymph potassium activity during initiation and maintenance of diuresis in fed *Rhodnius prolixus*. *J. exp. Biol.* **177**, 273–285.
- MCDONALD, D. G. AND PRIOR, E. T. (1988). Branchial mechanisms

- of ion and acid–base regulation in the freshwater rainbow trout, *Salmo gairdneri*. *Can. J. Zool.* **66**, 2699–2708.
- MCDONALD, D. G. AND WOOD, C. M. (1981). Branchial and renal acid and ion fluxes in the rainbow trout at low environmental pH. *J. exp. Biol.* **93**, 101–118.
- O'DONNELL, M. J. AND MADDRELL, S. H. P. (1995). Fluid reabsorption and ion transport by the lower Malpighian tubules of adult female *Drosophila*. *J. exp. Biol.* **198**, 1647–1653.
- ORCUTT, D. R., PULLIAM, B. R. AND ARP, A. (1961). Characteristics of steelhead trout redds in Idaho streams. *Trans. Am. Fish. Soc.* **97**, 42–45.
- PERRY, S. F. (1986). Carbon dioxide excretion in fishes. *Can. J. Zool.* **64**, 565–572.
- PETERSON, R. H. AND MARTIN-ROBICHAUD, D. J. (1986). Perivitelline and vitelline potentials in teleost eggs as influenced by ambient ionic strength, natal salinity and electrode electrolyte; and the influence of these potentials on cadmium dynamics within the egg. *Can. J. Fish. Aquat. Sci.* **43**, 1445–1450.
- PETERSON, R. H. AND MARTIN-ROBICHAUD, D. J. (1987). Permeability of the isolated Atlantic salmon (*Salmo salar*) chorion to ions as estimated by diffusion potentials. *Can. J. Fish. Aquat. Sci.* **44**, 1635–1639.
- PITTS, R. F. (1973). Production and excretion of ammonia in relation to acid–base regulation. In *Handbook of Physiology, Renal Physiology* (ed. J. Orloff and R. W. Berliner), pp. 455–496. Washington, DC: American Physiology Society.
- PLAYLE, R. C., MUNGER, R. S. AND WOOD, C. M. (1990). Effects of catecholamines on gas exchange and ventilation in rainbow trout (*Salmo gairdneri*). *J. exp. Biol.* **152**, 353–367.
- PLAYLE, R. C. AND WOOD, C. M. (1989). Water chemistry in the gill micro-environment of rainbow trout: experimental observations and theory. *J. comp. Physiol. B* **159**, 527–537.
- POTTS, W. T. W. AND RUDY, P. P., JR (1969). Water balance in the eggs of the Atlantic salmon, *Salmo salar*. *J. exp. Biol.* **50**, 223–237.
- RICE, S. D. AND STOKES, R. M. (1974). Metabolism of nitrogenous wastes in eggs and alevins of rainbow trout, *Salmo gairdneri* Richardson. In *The Early Life History of Fish* (ed. J. H. S. Blaxter), pp. 325–337. New York: Springer-Verlag.
- RIIS-VESTERGAARD, J. (1982). Water and salt balance of halibut eggs and larvae (*Hippoglossus hippoglossus*). *Mar. Biol.* **70**, 135–139.
- ROMBOUGH, P. J. (1988). Respiratory gas exchange, aerobic metabolism and effects of hypoxia during early life. In *Fish Physiology*, vol. XIA (ed. W. S. Hoar and D. J. Randall), pp. 59–161. New York: Academic Press.
- RUDY, P. P., JR AND POTTS, W. T. W. (1969). Sodium balance in the eggs of the Atlantic salmon, *Salmo salar*. *J. exp. Biol.* **50**, 239–246.
- SHEPHARD, K. L. AND MCWILLIAMS, P. G. (1989). Ionic regulation by eggs of salmon. *J. comp. Physiol. B* **159**, 249–254.
- SMITH, S. (1947). Studies in the development of rainbow trout (*Salmo irideus*). *J. exp. Biol.* **23**, 357–378.
- WILKIE, M. P. AND WOOD, C. M. (1991). Nitrogenous waste excretion, acid–base regulation and ionoregulation in rainbow trout (*Oncorhynchus mykiss*) exposed to extremely alkaline water. *Physiol. Zool.* **64**, 1069–1086.
- WILSON, R. W., WRIGHT, P. M., MUNGER, S. AND WOOD, C. M. (1994). Ammonia excretion in freshwater rainbow trout (*Oncorhynchus mykiss*) and the importance of gill boundary layer acidification: lack of evidence for Na<sup>+</sup>/NH<sub>4</sub><sup>+</sup> exchange. *J. exp. Biol.* **191**, 37–58.
- WRIGHT, P. A., FELSKIE, A. AND ANDERSON, P. M. (1995). Induction of ornithine–urea cycle enzymes and nitrogen metabolism and excretion in rainbow trout (*Oncorhynchus mykiss*) during early life stages. *J. exp. Biol.* **198**, 127–135.
- WRIGHT, P. A., HEMING, T. AND RANDALL, D. (1986). Downstream pH changes in water flowing over the gills of rainbow trout. *J. exp. Biol.* **126**, 499–512.
- WRIGHT, P. A., RANDALL, D. J. AND PERRY, S. F. (1989). Fish gill water boundary layer: a site of linkage between carbon dioxide and ammonia excretion. *J. comp. Physiol. B* **158**, 627–635.
- WRIGHT, P. A., RANDALL, D. J. AND WOOD, C. M. (1988a). The distribution of ammonia and H<sup>+</sup> between tissue compartments in lemon sole (*Parophrys vetulus*) at rest, during hypercapnia and following exercise. *J. exp. Biol.* **136**, 149–175.
- WRIGHT, P. A. AND WOOD, C. M. (1985). An analysis of branchial ammonia excretion in the freshwater rainbow trout: effects of environmental pH change and sodium uptake blockade. *J. exp. Biol.* **114**, 329–353.
- WRIGHT, P. A. AND WOOD, C. M. (1988). Muscle ammonia stores are not determined by pH gradients. *Fish Physiol. Biochem.* **5**, 159–162.
- WRIGHT, P. A., WOOD, C. M. AND RANDALL, D. J. (1988b). An *in vitro* and *in vivo* study of the distribution of ammonia between plasma and red cells of rainbow trout (*Salmo gairdneri*). *J. exp. Biol.* **134**, 423–428.
- YESAKI, T. Y. AND IWAMA, G. K. (1992). Some effects of water hardness on survival, acid–base regulation, ion regulation and ammonia excretion in rainbow trout in highly alkaline water. *Physiol. Zool.* **65**, 763–787.
